# Supplementary material
Source: PubMed Central journal article supplement (PMC6583688)
Supplement: jama-319-2388-s001.pdf [file jama-319-2388-s001.pdf]

## Supplementary Online Content

Song H, Fang F, Tomasson G, et al. Association of stress-related disorders with subsequent autoimmune disease. *JAMA*. doi:10.1001/jama.2018.7028

**eTable 1.** International Classification of Diseases (ICD) Codes for Exposure and Outcome Identification

**eTable 2.** Risk of Autoimmune Disease Among Patients With Acute Stress Reaction or Adjustment Disorder and Other Stress Reactions, Compared With Matched Unexposed Individuals

**eTable 3.** Risk of Autoimmune Disease Among Patients With Any Stress-Related Disorder or Posttraumatic Stress Disorder, Compared With Full Siblings

**eTable 4.** Risk of Autoimmune Disease Among Patients With Acute Stress Reaction or Adjustment Disorder and Other Stress Reactions, Compared With Full Siblings

**eTable 5.** Risk of Autoimmune Disease Among Patients With Acute Stress Reaction or Adjustment Disorder and Other Stress Reactions by Psychiatric Care Indicators, Compared With Matched Unexposed Individuals

**eTable 6.** Association of Stress-Related Disorders With Subsequent Autoimmune Disease, Additionally Adjusted for the Number of Health Care Visits During the First Year After Study Entry, Analysis of the Population-Matched Cohort

**eTable 7.** Association of Stress-Related Disorders With Subsequent Autoimmune Disease, Using Altered Definition for History of Other Psychiatric Disorders (One of Covariates) and Autoimmune Disease (Outcome), Analysis of the Population-Matched Cohort

**eTable 8.** Association of Stress-Related Disorders With Subsequent Autoimmune Disease, Using Different Lag-Time, Analysis of the Population-Matched Cohort

**eFigure 1.** Hazard Ratios of Autoimmune Disease Within the First Year of Study Entry, Analysis of the Population-Matched Cohort

**eFigure 2.** Associations Between Stress-Related Disorders and Multiple Autoimmune Syndrome (MAS), Analysis of the Population-Matched Cohort

**eFigure 3.** Cumulative Incidence Rates of Autoimmune Disease Among Patients With Stress-Related Disorder (Exposed Group) and Their Matched Unexposed Individuals (Unexposed Group)

This supplementary material has been provided by the authors to give readers additional information about their work.

**eTable 1. International Classification of Diseases (ICD) Codes for Exposure and Outcome Identification**

| Diseases                               |                                                                                           | ICD-8                                  | ICD-9                              | ICD-10                                               |
|----------------------------------------|-------------------------------------------------------------------------------------------|----------------------------------------|------------------------------------|------------------------------------------------------|
| <b>All stress-related disorder</b>     |                                                                                           | 307, 308.4                             | 309, 308                           | F43                                                  |
|                                        | PTSD                                                                                      |                                        | 309B                               | F43.1                                                |
|                                        | Acute stress reaction                                                                     |                                        | 309A, 308                          | F43.0                                                |
|                                        | Adjustment disorder                                                                       |                                        | 309X                               | F43.2                                                |
|                                        | Other stress reaction                                                                     |                                        | 309X                               | F43.8, F43.9                                         |
| <b>Any psychiatric disorder</b>        |                                                                                           | 290–315                                | 290–315                            | F**                                                  |
| <b>Autoimmune diseases</b>             |                                                                                           |                                        |                                    |                                                      |
| <b>Disease of endocrine system</b>     | Diabetes mellitus, insulin dependent                                                      | 250                                    | 250                                | E10                                                  |
|                                        | Autoimmune thyroid disease                                                                | 242.00, 242.09, 244, 245.03            | 242A, 242X, 244W, 244X, 245C, 245W | E03.5, E03.9, E05.0, E05.5, E05.9, E06.3, E06.5      |
|                                        | Addison's disease                                                                         | 255.1                                  | 255E                               | E27.1, E27.2                                         |
|                                        | Autoimmune polyglandular syndrome                                                         | 258.10                                 | 258B                               | E31.0                                                |
| <b>Inflammatory arthritis</b>          | Reactive arthritis (Reiter's syndrome)                                                    | 099.3, 711.1                           | 099D, 711A                         | M02.3, M02.8, M02.9                                  |
|                                        | Rheumatoid arthritis                                                                      | 712.00, 712.10, 712.20, 712.39, 712.38 | 714A-D, 719D                       | M05, M06, M08.0, M08.1, M08.2, M08.3, M08.4          |
|                                        | Ankylosing spondylitis                                                                    | 712.4                                  | 720A                               | M45                                                  |
| <b>Vasculitis</b>                      | Polyarteritis nodosa and related condition (Incl. Kawasaki, Churg-Strauss syndrome, etc.) | 446                                    | 446A, 446B                         | M30                                                  |
|                                        | Thrombotic microangiopathy                                                                | -                                      | 446G                               | M31.1                                                |
|                                        | Granulomatosis with polyangiitis (Wegeners's granulomatosis)                              | 446.20                                 | 446E                               | M31.3                                                |
|                                        | Microscopic polyangiitis                                                                  | -                                      | -                                  | M31.7                                                |
|                                        | Henoch-Schonlein purpura                                                                  | 287.00                                 | 287A                               | D69.0                                                |
|                                        | Giant cell arteritis/ Polymyalgia rheumatica                                              | 446.30, 446.31, 446.39, 717.9          | 446F, 725                          | M35.3, M31.5, M31.6                                  |
| <b>Connective tissue disorders</b>     | Systemic lupus erythematosus                                                              | 734.1                                  | 710A                               | M32                                                  |
|                                        | Polymyositis/dermatomyositis                                                              | 716.10, 716.00                         | 710E, 710D                         | M33.0, M33.1, M33.2, M33.9                           |
|                                        | Systematic sclerosis (scleroderma)                                                        | 710.0, 734.0                           | 710B                               | M34                                                  |
|                                        | Sjögren's syndrome                                                                        | 734.90                                 | 710C                               | M35.0                                                |
|                                        | Mixed connective tissue disease                                                           | 734.98, 734.91, 734.99                 | 710X, 710W                         | M35.1                                                |
|                                        | Behcet's syndrome                                                                         | 136.0                                  | 136B                               | M35.2                                                |
| <b>Disease of skin system</b>          | Pemphigus vulgaris                                                                        | 694.00                                 | 694E                               | L10.0                                                |
|                                        | Bullous pemphigoid                                                                        | 694.05                                 | 694F                               | L12                                                  |
|                                        | Dermatitis herpetiformis                                                                  | 693.99                                 | 694A                               | L13.0                                                |
|                                        | Psoriasis                                                                                 | 696                                    | 696A, 696B                         | L40                                                  |
|                                        | Alopecia areata                                                                           | 704.00                                 | 704A                               | L64                                                  |
|                                        | Vitiligo                                                                                  | 709.05                                 | 709A                               | L80                                                  |
| <b>Hematological diseases</b>          | Pernicious anemia                                                                         | 281.0                                  | 281A                               | D51.0                                                |
|                                        | Autoimmune hemolytic anemia                                                               | 283.90, 283.92                         | 283A                               | D59.0, D59.1                                         |
|                                        | Idiopathic thrombocytopenic purpura                                                       | 287.3                                  | 287D                               | D69.3                                                |
| <b>Disease of nervous system</b>       | Acute disseminated encephalomyelitis                                                      | -                                      | -                                  | G04                                                  |
|                                        | Anti-NMDA receptor encephalitis                                                           | -                                      | -                                  | G13.1                                                |
|                                        | Multiple sclerosis                                                                        | 340                                    | 340                                | G35                                                  |
|                                        | Neuromyelitis optica and ADEM                                                             | 341                                    | 341A                               | G36                                                  |
|                                        | Guillain-Barré syndrome                                                                   | 354.01                                 | 357A                               | G61.0, G61.1, G61.8, G61.9                           |
|                                        | Myasthenia gravis                                                                         | 733.0                                  | 358A                               | G70.0                                                |
| <b>Disease of the digestive system</b> | Primary biliary cirrhosis                                                                 | -                                      | 571G                               | K74.3                                                |
|                                        | Crohn's disease                                                                           | 563.00                                 | 555                                | K50                                                  |
|                                        | Ulcerative colitis                                                                        | 563.10, 569.02                         | 556                                | K51                                                  |
|                                        | Coeliac disease                                                                           | 269.00, 269.98                         | 579A                               | K90.0                                                |
| <b>Others</b>                          | Acute rheumatic fever and chorea                                                          | 390-392                                | 390-392                            | I00, I01.0, I01.1, I01.2, I01.8, I01.9, I02.0, I02.9 |
|                                        | Sarcoidosis                                                                               | 135                                    | 135                                | D86                                                  |
|                                        | IgA nephropaty                                                                            | 580,582                                | 580,582                            | N00,N01,N03,N05                                      |

**eTable 2. Risk of Autoimmune Disease Among Patients With Acute Stress Reaction or Adjustment Disorder and Other Stress Reactions, Compared With Matched Unexposed Individuals**

|                                                              | Acute stress reaction                                                                                                 |                                     |                                                                |                                       | Adjustment disorder and other stress reactions |                                                                                                                       |                                     |                                                                |                                       |                             |
|--------------------------------------------------------------|-----------------------------------------------------------------------------------------------------------------------|-------------------------------------|----------------------------------------------------------------|---------------------------------------|------------------------------------------------|-----------------------------------------------------------------------------------------------------------------------|-------------------------------------|----------------------------------------------------------------|---------------------------------------|-----------------------------|
|                                                              | No. of autoimmune disease cases/<br>No. of accumulated person-years×1<br>000 (incidence rate/ 1 000 person-<br>years) |                                     | Absolute rate<br>difference/ 1 000<br>person-years<br>(95% CI) | Hazard ratio<br>(95% CI) <sup>a</sup> | P<br>valu<br>e <sup>b</sup>                    | No. of autoimmune disease cases/<br>No. of accumulated person-<br>years×1 000 (incidence rate/ 1 000<br>person-years) |                                     | Absolute rate<br>difference/ 1 000<br>person-years<br>(95% CI) | Hazard ratio<br>(95% CI) <sup>a</sup> | P<br>valu<br>e <sup>b</sup> |
|                                                              | Exposed patients                                                                                                      | Matched<br>unexposed<br>Individuals |                                                                |                                       |                                                | Exposed<br>patients                                                                                                   | Matched<br>unexposed<br>Individuals |                                                                |                                       |                             |
| All                                                          | 3449/376.6(9.2)                                                                                                       | 24103/3990.0(6.0)                   | 3.12 (2.80-3.43)                                               | 1.35 (1.30-1.40)                      |                                                |                                                                                                                       |                                     |                                                                |                                       |                             |
| <b>By sex</b>                                                |                                                                                                                       |                                     |                                                                |                                       |                                                |                                                                                                                       |                                     |                                                                |                                       |                             |
| Female                                                       | 2323/214.0(10.9)                                                                                                      | 16077/2237.7(7.2)                   | 3.67 (3.21-4.12)                                               | 1.35 (1.29-1.41)                      | .90                                            |                                                                                                                       |                                     |                                                                |                                       | .90                         |
| Male                                                         | 1126/162.6(6.9)                                                                                                       | 8026/1752.3(4.6)                    | 2.35 (1.93-2.76)                                               | 1.35 (1.26-1.44)                      |                                                | 4303/484.8(8.9)                                                                                                       | 30196/5152.6(5.9)                   | 3.02 (2.74-3.29)                                               | 1.37 (1.32-1.41)                      |                             |
| <b>By age at index date (quartiles), years</b>               |                                                                                                                       |                                     |                                                                |                                       |                                                |                                                                                                                       |                                     |                                                                |                                       |                             |
| ≤33                                                          | 1012/140.0(7.2)                                                                                                       | 6420/1442.5(4.5)                    | 2.78 (2.32-3.24)                                               | 1.44 (1.34-1.55)                      | .002                                           |                                                                                                                       |                                     |                                                                |                                       | <.00<br>1                   |
| 34-41                                                        | 746/92.0(8.1)                                                                                                         | 5070/972.1(5.2)                     | 2.90 (2.30-3.50)                                               | 1.32 (1.21-1.43)                      |                                                | 1349/196.8(6.9)                                                                                                       | 8572/2051.3(4.2)                    | 2.68 (2.30-3.05)                                               | 1.49 (1.40-1.58)                      |                             |
| 42-50                                                        | 882/84.8(10.4)                                                                                                        | 5992/908.1(6.6)                     | 3.81 (3.10-4.51)                                               | 1.40 (1.30-1.51)                      |                                                | 1034/116.3(8.9)                                                                                                       | 6675/1239.5(5.4)                    | 3.50 (2.95-4.06)                                               | 1.48 (1.38-1.59)                      |                             |
| ≥51                                                          | 809/59.9(13.5)                                                                                                        | 6621/667.3(9.9)                     | 3.59 (2.63-4.55)                                               | 1.21 (1.12-1.31)                      |                                                | 982/101.8(9.7)                                                                                                        | 7483/1097.2(6.8)                    | 2.83 (2.20-3.45)                                               | 1.23 (1.14-1.32)                      |                             |
|                                                              |                                                                                                                       |                                     |                                                                |                                       |                                                | 938/69.9(13.4)                                                                                                        | 7466/764.7(9.8)                     | 3.65 (2.76-4.54)                                               | 1.23 (1.15-1.33)                      |                             |
| <b>By time since index date, years</b>                       |                                                                                                                       |                                     |                                                                |                                       |                                                |                                                                                                                       |                                     |                                                                |                                       |                             |
| 1 to <5                                                      | 1165/144.9(8.0)                                                                                                       | 7761/1489.3(5.2)                    | 2.82 (2.35-3.30)                                               | 1.33 (1.25-1.42)                      | .96                                            |                                                                                                                       |                                     |                                                                |                                       | .11                         |
| 5 to <10                                                     | 1013/116.1(8.7)                                                                                                       | 7019/1221.3(5.8)                    | 2.99 (2.43-3.54)                                               | 1.36 (1.27-1.46)                      |                                                | 1453/170.8(8.5)                                                                                                       | 9074/1747.2(5.2)                    | 3.31 (2.86-3.76)                                               | 1.46 (1.37-1.54)                      |                             |
| ≥10                                                          | 1271/115.6(11.0)                                                                                                      | 9323/1279.4(7.3)                    | 3.70 (3.08-4.33)                                               | 1.36 (1.28-1.45)                      |                                                | 1074/138.2(7.8)                                                                                                       | 7835/1447.0(5.4)                    | 2.35 (1.87-2.83)                                               | 1.28 (1.19-1.37)                      |                             |
| <b>By calendar year at index date</b>                        |                                                                                                                       |                                     |                                                                |                                       |                                                |                                                                                                                       |                                     |                                                                |                                       |                             |
| 1981-1990                                                    | 616/81.7(7.5)                                                                                                         | 4543/887.7(5.1)                     | 2.43 (1.81-3.04)                                               | 1.32 (1.21-1.45)                      | .89                                            |                                                                                                                       |                                     |                                                                |                                       | .24                         |
| 1991-2000                                                    | 1262/142.3(8.9)                                                                                                       | 8880/1519.7(5.8)                    | 3.03 (2.52-3.53)                                               | 1.36 (1.27-1.45)                      |                                                | 1347/193.5(7.0)                                                                                                       | 10212/2112.7(4.8)                   | 2.13 (1.74-2.51)                                               | 1.31 (1.23-1.39)                      |                             |
| 2001-2013                                                    | 1571/152.7(10.3)                                                                                                      | 10680/1582.6(6.8)                   | 3.54 (3.02-4.07)                                               | 1.35 (1.28-1.43)                      |                                                | 1020/110.6(9.2)                                                                                                       | 7143/1186.4(6.0)                    | 3.20 (2.62-3.78)                                               | 1.37 (1.27-1.47)                      |                             |
| <b>By history of other psychiatric disorders<sup>c</sup></b> |                                                                                                                       |                                     |                                                                |                                       |                                                |                                                                                                                       |                                     |                                                                |                                       |                             |
| Yes                                                          | 1123/97.3(11.5)                                                                                                       | 1548/162.9(9.5)                     | 2.03 (1.21-2.86)                                               | 1.26 (1.09-1.46)                      | .03                                            | 1375/121.4(11.3)                                                                                                      | 1790/192.4(9.3)                     | 2.02 (1.29-2.76)                                               | 1.20 (1.04-1.37)                      | .02                         |

**eTable 2. Risk of Autoimmune Disease Among Patients With Acute Stress Reaction or Adjustment Disorder and Other Stress Reactions, Compared With Matched Unexposed Individuals (Continued)**

|                                                                                            | Acute stress reaction                                                                                                 |                                     |                                                                |                                       | Adjustment disorder and other stress reactions |                                                                                                                       |                                     |                                                                 |                                       |                         |
|--------------------------------------------------------------------------------------------|-----------------------------------------------------------------------------------------------------------------------|-------------------------------------|----------------------------------------------------------------|---------------------------------------|------------------------------------------------|-----------------------------------------------------------------------------------------------------------------------|-------------------------------------|-----------------------------------------------------------------|---------------------------------------|-------------------------|
|                                                                                            | No. of autoimmune disease cases/<br>No. of accumulated person-<br>years×1 000 (incidence rate/ 1 000<br>person-years) |                                     | Absolute rate<br>difference/ 1 000<br>person-years<br>(95% CI) | Hazard ratio<br>(95% CI) <sup>a</sup> | P<br>value <sup>b</sup>                        | No. of autoimmune disease cases/<br>No. of accumulated person-<br>years×1 000 (incidence rate/ 1 000<br>person-years) |                                     | Absolute rate<br>difference/ 1<br>000 person-<br>years (95% CI) | Hazard ratio<br>(95% CI) <sup>a</sup> | P<br>value <sup>b</sup> |
|                                                                                            | Exposed<br>patients                                                                                                   | Matched<br>unexposed<br>Individuals |                                                                |                                       |                                                | Exposed<br>patients                                                                                                   | Matched<br>unexposed<br>Individuals |                                                                 |                                       |                         |
| No                                                                                         | 2326/279.3(8.3)                                                                                                       | 22555/3827.1(5.9)                   | 2.44 (2.09-2.78)                                               | 1.38 (1.32-1.44)                      |                                                | 2928/363.4(8.1)                                                                                                       | 28406/4960.2(5.7)                   | 2.33 (2.03-2.63)                                                | 1.39 (1.34-1.45)                      |                         |
| <b>By family history of autoimmune diseases among first-degree relatives</b>               |                                                                                                                       |                                     |                                                                |                                       |                                                |                                                                                                                       |                                     |                                                                 |                                       |                         |
| Yes                                                                                        | 885/74.6(11.9)                                                                                                        | 5655/699.7(8.1)                     | 3.78 (2.97-4.59)                                               | 1.32 (1.19-1.46)                      | .67                                            | 1011/86.3(11.7)                                                                                                       | 6581/818.3(8.0)                     | 3.67 (2.92-4.41)                                                | 1.35 (1.23-1.48)                      | .74                     |
| No                                                                                         | 2564/302.0(8.5)                                                                                                       | 18448/3290.3(5.6)                   | 2.88 (2.55-3.22)                                               | 1.36 (1.30-1.42)                      |                                                | 3292/398.5(8.3)                                                                                                       | 23615/4334.3(5.5)                   | 2.81 (2.52-3.10)                                                | 1.37 (1.31-1.42)                      |                         |
| <b>By number of health care visits during the first year after study entry<sup>d</sup></b> |                                                                                                                       |                                     |                                                                |                                       |                                                |                                                                                                                       |                                     |                                                                 |                                       |                         |
| 0-1 time                                                                                   | 2019/256.5(7.9)                                                                                                       | 20811/3677.4(5.7)                   | 2.21 (1.86-2.57)                                               | 1.30 (1.23-1.36)                      | <.001                                          | 2466/326.6(7.6)                                                                                                       | 26297/4770.1(5.5)                   | 2.04 (1.73-2.34)                                                | 1.29 (1.23-1.34)                      | .04                     |
| ≥ 2 times                                                                                  | 1430/120.2(11.9)                                                                                                      | 3292/312.6(10.5)                    | 1.37 (0.66-2.08)                                               | 1.12 (1.02-1.24)                      |                                                | 1837/158.2(11.6)                                                                                                      | 3899/382.5(10.2)                    | 1.42 (0.80-2.04)                                                | 1.15 (1.06-1.25)                      |                         |

<sup>a</sup> Cox models were stratified by matching identifiers (birth year and sex), and adjusted for education level, family income, marital status, Charlson comorbidity index score, family history of autoimmune disease, and history of other psychiatric disorders. The first year of follow-up was excluded for all analyses.

<sup>b</sup> P value was derived from interaction test by incorporating an interaction term to the Cox model.

<sup>c</sup> Psychiatric disorders diagnosed *before* 3 months prior to the index date (i.e., the diagnosis date of exposed patients or the diagnosis date of the index patient for matched unexposed individuals and siblings).

<sup>d</sup> Both inpatient stay and outpatient visit were included. The first month after study entry was removed from this calculation.

**eTable 3. Risk of Autoimmune Disease Among Patients With Any Stress-Related Disorder or Posttraumatic Stress Disorder, Compared With Full Siblings**

|                                                              | All stress-related disorders                                                                                |                  |                                                       |                                    | Posttraumatic stress disorder |                                                                                                             |               |                                                       |                                    |                      |
|--------------------------------------------------------------|-------------------------------------------------------------------------------------------------------------|------------------|-------------------------------------------------------|------------------------------------|-------------------------------|-------------------------------------------------------------------------------------------------------------|---------------|-------------------------------------------------------|------------------------------------|----------------------|
|                                                              | No. of autoimmune disease cases/ No. of accumulated person-years×1 000 (incidence rate/ 1 000 person-years) |                  | Absolute rate difference/ 1 000 person-years (95% CI) | Hazard ratio (95% CI) <sup>a</sup> | P value <sup>b</sup>          | No. of autoimmune disease cases/ No. of accumulated person-years×1 000 (incidence rate/ 1 000 person-years) |               | Absolute rate difference/ 1 000 person-years (95% CI) | Hazard ratio (95% CI) <sup>a</sup> | P value <sup>b</sup> |
|                                                              | Exposed patients                                                                                            | Full siblings    |                                                       |                                    |                               | Exposed patients                                                                                            | Full siblings |                                                       |                                    |                      |
| <b>All</b>                                                   | 6067/674.4(9.0)                                                                                             | 8151/1253.6(6.5) | 2.49 (2.23-2.76)                                      | 1.29 (1.24-1.35)                   |                               |                                                                                                             |               |                                                       |                                    |                      |
| <b>By sex</b>                                                |                                                                                                             |                  |                                                       |                                    |                               |                                                                                                             |               |                                                       |                                    |                      |
| Female                                                       | 4175/400.7(10.4)                                                                                            | 4910/614.3(8.0)  | 2.43 (2.04-2.81)                                      | 1.27 (1.19-1.35)                   | .81                           | 297/24.7(12.1)                                                                                              | 265/33.5(7.9) | 4.14 (2.47-5.81)                                      | 1.23 (0.95-1.59)                   | .06                  |
| Male                                                         | 1892/273.7(6.9)                                                                                             | 3241/639.2(5.1)  | 1.84 (1.49-2.20)                                      | 1.36 (1.24-1.49)                   |                               | 92/12.8(7.2)                                                                                                | 174/35.6(4.9) | 2.31 (0.67-3.95)                                      | 2.17 (1.36-3.45)                   |                      |
| <b>By age at index date (quartiles), year</b>                |                                                                                                             |                  |                                                       |                                    |                               |                                                                                                             |               |                                                       |                                    |                      |
| ≤33                                                          | 1788/251.9(7.10)                                                                                            | 1909/432.1(4.4)  | 2.68 (2.30-3.06)                                      | 1.44 (1.32-1.57)                   | <.01                          | 111/10.1(11.0)                                                                                              | 79/15.3(5.2)  | 2.51 (0.28-4.75)                                      | 2.27 (1.46-3.52)                   | .26                  |
| 34-41                                                        | 1468/173.0(8.49)                                                                                            | 1782/301.3(5.9)  | 2.57 (2.06-3.09)                                      | 1.24 (1.10-1.39)                   |                               | 90/10.0(9.0)                                                                                                | 106/16.3(6.5) | 5.44 (3.51-7.36)                                      | 0.91 (0.55-1.49)                   |                      |
| 42-50                                                        | 1524/152.1(10.0)                                                                                            | 2177/300.5(7.2)  | 2.77 (2.18-3.36)                                      | 1.21 (1.09-1.35)                   |                               | 96/9.4(10.2)                                                                                                | 127/18.1(7.0) | 3.20 (0.82-5.58)                                      | 1.79 (1.16-2.78)                   |                      |
| ≥51                                                          | 1287/97.4(13.2)                                                                                             | 2283/219.6(10.4) | 2.82 (1.98-3.66)                                      | 1.15 (1.04-1.28)                   |                               | 92/6.1(15.2)                                                                                                | 127/14.0(9.1) | 6.13 (2.65-9.62)                                      | 1.43 (1.25-1.65)                   |                      |
| <b>By time since index date, years</b>                       |                                                                                                             |                  |                                                       |                                    |                               |                                                                                                             |               |                                                       |                                    |                      |
| 1 to <5                                                      | 2068/248.4(8.3)                                                                                             | 2236/420.6(5.3)  | 3.00 (2.58-3.43)                                      | 1.33 (1.24-1.43)                   | .27                           | 148/14.7(10.1)                                                                                              | 117/24.9(4.7) | 5.36 (3.53-7.19)                                      | 1.49 (1.08-2.05)                   | .58                  |
| 5 to <10                                                     | 1630/198.8(8.2)                                                                                             | 2102/361.4(5.8)  | 2.38 (1.91-2.85)                                      | 1.31 (1.21-1.42)                   |                               | 98/10.9(9.0)                                                                                                | 114/20.0(5.7) | 3.28 (1.21-5.36)                                      | 1.33 (0.95-1.85)                   |                      |
| ≥10                                                          | 2369/227.2(10.4)                                                                                            | 3813/471.6(8.1)  | 2.34 (1.85-2.83)                                      | 1.26 (1.18-1.34)                   |                               | 143/11.8(12.1)                                                                                              | 208/24.2(8.6) | 3.52 (1.22-5.83)                                      | 1.32 (1.00-1.74)                   |                      |
| <b>By calendar year at index date</b>                        |                                                                                                             |                  |                                                       |                                    |                               |                                                                                                             |               |                                                       |                                    |                      |
| 1981-1990                                                    | 1517/212.0(7.2)                                                                                             | 2563/449.9(5.7)  | 1.46 (1.04-1.88)                                      | 1.25 (1.15-1.35)                   | 0.07                          | 83/10.0(8.0)                                                                                                | 122/20.3(6.0) | 2.27 (0.20-4.35)                                      | 1.25 (0.89-1.78)                   | .17                  |
| 1991-2000                                                    | 1780/199.0(8.9)                                                                                             | 2594/390.5(6.6)  | 2.30 (1.81-2.79)                                      | 1.28 (1.19-1.38)                   |                               | 111/11.7(9.5)                                                                                               | 151/23.6(6.4) | 3.13 (1.09-5.17)                                      | 1.33 (0.98-1.80)                   |                      |
| 2001-2013                                                    | 2770/263.5(10.5)                                                                                            | 2994/413.2(7.3)  | 3.27 (2.80-3.74)                                      | 1.34 (1.25-1.42)                   |                               | 195/15.7(12.4)                                                                                              | 166/25.1(6.6) | 5.78 (3.77-7.79)                                      | 1.52 (1.15-2.00)                   |                      |
| <b>By history of other psychiatric disorders<sup>c</sup></b> |                                                                                                             |                  |                                                       |                                    |                               |                                                                                                             |               |                                                       |                                    |                      |
| Yes                                                          | 2004/172.5(11.6)                                                                                            | 904/94.1(9.6)    | 2.01 (1.21-2.82)                                      | 1.05 (0.88-1.25)                   | .17                           | 140/11.9(11.8)                                                                                              | 49/5.2(9.5)   | 2.30 (-1.0-5.60)                                      | 1.18 (0.53-2.63)                   | .65                  |

**eTable 3. Risk of Autoimmune Disease Among Patients With Any Stress-Related Disorder or Posttraumatic Stress Disorder, Compared With Full Siblings (Continued)**

|                                                                                            | All stress-related disorders                                                                                |                  |                                                       |                                    | Posttraumatic stress disorder |                                                                                                             |               |                                                       |                                    |                      |
|--------------------------------------------------------------------------------------------|-------------------------------------------------------------------------------------------------------------|------------------|-------------------------------------------------------|------------------------------------|-------------------------------|-------------------------------------------------------------------------------------------------------------|---------------|-------------------------------------------------------|------------------------------------|----------------------|
|                                                                                            | No. of autoimmune disease cases/ No. of accumulated person-years×1 000 (incidence rate/ 1 000 person-years) |                  | Absolute rate difference/ 1 000 person-years (95% CI) | Hazard ratio (95% CI) <sup>a</sup> | P value <sup>b</sup>          | No. of autoimmune disease cases/ No. of accumulated person-years×1 000 (incidence rate/ 1 000 person-years) |               | Absolute rate difference/ 1 000 person-years (95% CI) | Hazard ratio (95% CI) <sup>a</sup> | P value <sup>b</sup> |
|                                                                                            | Exposed patients                                                                                            | Full siblings    |                                                       |                                    |                               | Exposed patients                                                                                            | Full siblings |                                                       |                                    |                      |
| No                                                                                         | 4063/501.9(8.1)                                                                                             | 7247/1159.5(6.3) | 1.84 (1.56-2.13)                                      | 1.31 (1.25-1.37)                   |                               |                                                                                                             |               |                                                       |                                    |                      |
| <b>By family history of autoimmune diseases among first-degree relatives</b>               |                                                                                                             |                  |                                                       |                                    |                               |                                                                                                             |               |                                                       |                                    |                      |
| Yes                                                                                        | 1495/125.8(11.9)                                                                                            | 2069/243.0(8.5)  | 3.37 (2.66-4.08)                                      | 1.29 (1.19-1.39)                   |                               |                                                                                                             |               |                                                       |                                    |                      |
| No                                                                                         | 4572/548.6(8.3)                                                                                             | 6082/1010.6(6.0) | 2.32 (2.03-2.60)                                      | 1.30 (1.24-1.36)                   | .97                           | 105/7.7(13.7)                                                                                               | 108/14.6(7.4) | 6.31 (3.34-9.29)                                      | 1.50 (1.06-2.11)                   | .37                  |
| <b>By number of health care visits during the first year after study entry<sup>d</sup></b> |                                                                                                             |                  |                                                       |                                    |                               |                                                                                                             |               |                                                       |                                    |                      |
| 0-1 time                                                                                   | 3406/447.9(7.6)                                                                                             | 6910/1142.9(6.1) | 1.56 (1.27-1.85)                                      | 1.23 (1.17-1.30)                   |                               | 181/20.9(8.7)                                                                                               | 363/62.3(5.8) | 2.85 (1.45-4.25)                                      | 1.40 (1.11-1.77)                   |                      |
| ≥ 2 times                                                                                  | 2661/226.6(11.8)                                                                                            | 1241/110.7(11.2) | 0.54 (-0.23-1.30)                                     | 1.01 (0.89-1.15)                   | .12                           | 208/16.6(12.6)                                                                                              | 76/6.8(11.2)  | 1.33 (-1.7-4.38)                                      | 1.23 (0.74-2.04)                   | .93                  |

<sup>a</sup> Cox models were stratified by family identifier, and adjusted for sex, age at study entry, education level, family income, marital status, Charlson comorbidity index score, family history of autoimmune disease, and history of other psychiatric disorders. The first year of follow-up was excluded for all analyses.

<sup>b</sup> P value was derived from interaction test by incorporating an interaction term to the Cox model.

<sup>c</sup> Psychiatric disorders diagnosed *before* 3 months prior to the index date (i.e., the diagnosis date of exposed patients or the diagnosis date of the index patient for matched unexposed individuals and siblings).

<sup>d</sup> Both inpatient stay and outpatient visit were included. The first month after study entry was removed from this calculation.

**eTable 4. Risk of Autoimmune Disease Among Patients With Acute Stress Reaction or Adjustment Disorder and Other Stress Reactions, Compared With Full Siblings**

|                                                              | Acute stress reaction                                                                                       |                 |                                                       |                                    | Adjustment disorder and other stress reactions |                                                                                                             |                 |                                                           |                                    |                      |
|--------------------------------------------------------------|-------------------------------------------------------------------------------------------------------------|-----------------|-------------------------------------------------------|------------------------------------|------------------------------------------------|-------------------------------------------------------------------------------------------------------------|-----------------|-----------------------------------------------------------|------------------------------------|----------------------|
|                                                              | No. of autoimmune disease cases/ No. of accumulated person-years×1 000 (incidence rate/ 1 000 person-years) |                 | Absolute rate difference/ 1 000 person-years (95% CI) | Hazard ratio (95% CI) <sup>a</sup> | P value <sup>b</sup>                           | No. of autoimmune disease cases/ No. of accumulated person-years×1 000 (incidence rate/ 1 000 person-years) |                 | Absolute rate difference, per 1 000 person-years (95% CI) | Hazard ratio (95% CI) <sup>a</sup> | P value <sup>b</sup> |
|                                                              | Exposed patients                                                                                            | Full siblings   |                                                       |                                    |                                                | Exposed patients                                                                                            | Full siblings   |                                                           |                                    |                      |
| <b>All</b>                                                   | 2531/278.2(9.1)                                                                                             | 3415/513.8(6.7) | 2.45 (2.03-2.87)                                      | 1.31 (1.23-1.40)                   |                                                | 3147/358.8(8.8)                                                                                             | 4297/670.8(6.4) | 2.36 (2.00-2.73)                                          | 1.27 (1.20-1.34)                   |                      |
| <b>By sex</b>                                                |                                                                                                             |                 |                                                       |                                    |                                                |                                                                                                             |                 |                                                           |                                    |                      |
| Female                                                       | 1685/157.4(10.7)                                                                                            | 2081/252.7(8.2) | 2.47 (1.85-3.09)                                      | 1.33 (1.20-1.47)                   | .70                                            | 2193/218.7(10.0)                                                                                            | 2564/328.2(7.8) | 2.22 (1.70-2.73)                                          | 1.24 (1.13-1.35)                   | .98                  |
| Male                                                         | 846/120.8(7.0)                                                                                              | 1334/261.1(5.1) | 1.89 (1.35-2.44)                                      | 1.33 (1.16-1.54)                   |                                                | 954/140.2(6.8)                                                                                              | 1733/342.6(5.1) | 1.75 (1.25-2.24)                                          | 1.34 (1.18-1.53)                   |                      |
| <b>By age at index date (quartiles), year</b>                |                                                                                                             |                 |                                                       |                                    |                                                |                                                                                                             |                 |                                                           |                                    |                      |
| ≤33                                                          | 709/98.3(7.2)                                                                                               | 746/162.1(4.6)  | 2.61 (1.99-3.24)                                      | 1.43 (1.25-1.65)                   | .01                                            | 968/141.7(6.8)                                                                                              | 1084/249.5(4.4) | 2.49 (1.99-2.99)                                          | 1.40 (1.24-1.57)                   | .002                 |
| 34-41                                                        | 585/71.9(8.1)                                                                                               | 729/124.7(5.8)  | 2.30 (1.51-3.08)                                      | 1.21 (1.01-1.46)                   |                                                | 793/91.1(8.7)                                                                                               | 947/160.3(5.9)  | 2.79 (2.08-3.51)                                          | 1.33 (1.13-1.56)                   |                      |
| 42-50                                                        | 691/66.1(10.5)                                                                                              | 913/129.1(7.1)  | 3.38 (2.48-4.29)                                      | 1.42 (1.21-1.68)                   |                                                | 737/76.7(9.6)                                                                                               | 1137/153.3(7.4) | 2.20 (1.38-3.02)                                          | 1.07 (0.92-1.25)                   |                      |
| ≥51                                                          | 546/42.0(13.0)                                                                                              | 1027/97.9(10.5) | 2.52 (1.25-3.78)                                      | 1.15 (0.99-1.34)                   |                                                | 92/6.1(15.2)                                                                                                | 127/14.010(9.1) | 2.66 (1.48-3.85)                                          | 1.10 (0.95-1.27)                   |                      |
| <b>By time since index date, years</b>                       |                                                                                                             |                 |                                                       |                                    |                                                |                                                                                                             |                 |                                                           |                                    |                      |
| 1 to <5                                                      | 854/106.7(8.0)                                                                                              | 955/180.4(5.3)  | 2.70 (2.07-3.34)                                      | 1.31 (1.18-1.47)                   | .16                                            | 1066/127.0(8.4)                                                                                             | 1164/215.3(5.4) | 2.99 (2.39-3.58)                                          | 1.33 (1.20-1.47)                   | .32                  |
| 5 to <10                                                     | 735/85.3(8.6)                                                                                               | 941/155.3(6.1)  | 2.56 (1.83-3.30)                                      | 1.40 (1.24-1.58)                   |                                                | 797/102.7(7.8)                                                                                              | 1047/186.2(5.6) | 2.14 (1.50-2.78)                                          | 1.23 (1.09-1.37)                   |                      |
| ≥10                                                          | 942/86.2(10.9)                                                                                              | 1519/178.1(8.5) | 2.39 (1.58-3.21)                                      | 1.25 (1.13-1.38)                   |                                                | 1284/129.1(9.9)                                                                                             | 2086/269.3(7.8) | 2.20 (1.56-2.83)                                          | 1.26 (1.16-1.38)                   |                      |
| <b>By calendar year at index date</b>                        |                                                                                                             |                 |                                                       |                                    |                                                |                                                                                                             |                 |                                                           |                                    |                      |
| 1981-1990                                                    | 451/60.9(7.4)                                                                                               | 795/130.4(6.1)  | 1.31 (0.51-2.12)                                      | 1.20 (1.04-1.37)                   | .08                                            | 983/141.1(6.97)                                                                                             | 1646/299.2(5.5) | 1.47 (0.96-1.98)                                          | 1.28 (1.16-1.41)                   | .76                  |
| 1991-2000                                                    | 946/105.5(9.0)                                                                                              | 1399/207.7(6.7) | 2.23 (1.56-2.90)                                      | 1.29 (1.16-1.42)                   |                                                | 723/81.8(8.9)                                                                                               | 1044/159.1(6.6) | 2.28 (1.52-3.03)                                          | 1.25 (1.11-1.41)                   |                      |
| 2001-2013                                                    | 1134/111.8(10.1)                                                                                            | 1221/175.6(7.0) | 3.19 (2.48-3.90)                                      | 1.40 (1.27-1.55)                   |                                                | 1441/135.9(10.6)                                                                                            | 1607/212.5(7.6) | 3.04 (2.38-3.70)                                          | 1.27 (1.17-1.39)                   |                      |
| <b>By history of other psychiatric disorders<sup>c</sup></b> |                                                                                                             |                 |                                                       |                                    |                                                |                                                                                                             |                 |                                                           |                                    |                      |
| Yes                                                          | 835/71.0(11.8)                                                                                              | 371/39.6(9.4)   | 2.39 (1.14-3.63)                                      | 1.17 (0.90-1.52)                   | .42                                            | 1029/89.6(11.5)                                                                                             | 484/49.4(9.8)   | 1.68 (0.56-2.80)                                          | 0.94 (0.73-1.22)                   | .02                  |
| No                                                           | 1696/207.2(8.2)                                                                                             | 3044/474.2(6.4) | 1.77 (1.31-2.22)                                      | 1.28 (1.19-1.38)                   |                                                | 2118/269.2(7.9)                                                                                             | 3813/621.4(6.1) | 1.73 (1.34-2.12)                                          | 1.31 (1.23-1.40)                   |                      |

**eTable 4. Risk of Autoimmune Disease Among Patients With Acute Stress Reaction or Adjustment Disorder and Other Stress Reactions, Compared With Full Siblings (Continued)**

|                                                                                            | Acute stress reaction                                                                                       |                 |                                                      |                                    | Adjustment disorder and other stress reactions |                                                                                                             |                 |                                                       |                                    |                      |
|--------------------------------------------------------------------------------------------|-------------------------------------------------------------------------------------------------------------|-----------------|------------------------------------------------------|------------------------------------|------------------------------------------------|-------------------------------------------------------------------------------------------------------------|-----------------|-------------------------------------------------------|------------------------------------|----------------------|
|                                                                                            | No. of autoimmune disease cases/ No. of accumulated person-years×1 000 (incidence rate/ 1 000 person-years) |                 | Absolute rate difference/1 000 person-years (95% CI) | Hazard ratio (95% CI) <sup>a</sup> | P value <sup>b</sup>                           | No. of autoimmune disease cases/ No. of accumulated person-years×1 000 (incidence rate/ 1 000 person-years) |                 | Absolute rate difference/ 1 000 person-years (95% CI) | Hazard ratio (95% CI) <sup>a</sup> | P value <sup>b</sup> |
|                                                                                            | Exposed patients                                                                                            | Full siblings   |                                                      |                                    |                                                | Exposed patients                                                                                            | Full siblings   |                                                       |                                    |                      |
| <b>By family history of autoimmune diseases among first-degree relatives</b>               |                                                                                                             |                 |                                                      |                                    |                                                |                                                                                                             |                 |                                                       |                                    |                      |
| Yes                                                                                        | 652/54.4(12.0)                                                                                              | 903/107.3(8.4)  | 3.58 (2.50-4.65)                                     | 1.35 (1.20-1.53)                   | .62                                            | 738/63.8(11.6)                                                                                              | 1058/121.1(8.7) | 2.84 (1.85-3.82)                                      | 1.20 (1.07-1.35)                   | .39                  |
| No                                                                                         | 1879/223.8(8.4)                                                                                             | 2512/406.4(6.2) | 2.21 (1.76-2.66)                                     | 1.30 (1.21-1.40)                   |                                                | 2409/295.1(8.2)                                                                                             | 3239/549.7(5.9) | 2.27 (1.89-2.66)                                      | 1.29 (1.21-1.38)                   |                      |
| <b>By number of health care visits during the first year after study entry<sup>d</sup></b> |                                                                                                             |                 |                                                      |                                    |                                                |                                                                                                             |                 |                                                       |                                    |                      |
| 0-1 time                                                                                   | 1469/187.9(7.8)                                                                                             | 2898/466.1(6.2) | 1.60 (1.14-2.06)                                     | 1.23 (1.13-1.33)                   | .44                                            | 1756/239.1(7.3)                                                                                             | 3649/614.5(5.9) | 1.41 (1.01-1.80)                                      | 1.22 (1.13-1.31)                   | .12                  |
| ≥ 2 times                                                                                  | 1062/90.3(11.8)                                                                                             | 517/47.7(10.9)  | 0.92 (-.26-2.09)                                     | 1.08 (0.87-1.33)                   |                                                | 1391/119.7(11.6)                                                                                            | 648/56.3(11.5)  | 0.11 (-.97-1.18)                                      | 0.93 (0.77-1.11)                   |                      |

<sup>a</sup> Cox models were stratified by family identifier, and adjusted for sex, age at study entry, education level, family income, marital status, Charlson comorbidity index score, family history of autoimmune disease, and history of other psychiatric disorders. The first year of follow-up was excluded for all analyses.

<sup>b</sup> P value was derived from interaction test by incorporating an interaction term to the Cox model.

<sup>c</sup> Psychiatric disorders diagnosed *before* 3 months prior to the index date (i.e., the diagnosis date of exposed patients or the diagnosis date of the index patient for matched unexposed individuals and siblings)

<sup>d</sup> Both inpatient stay and outpatient visit were included. The first month after study entry was removed from this calculation.



**eTable 5. Risk of Autoimmune Disease Among Patients With Acute Stress Reaction or Adjustment Disorder and Other Stress Reactions by Psychiatric Care Indicators, Compared With Matched Unexposed Individuals**

| Indicators of psychiatric care                                                                          | Acute stress reaction                                                                                       |                               |                                                       |                                    | Adjustment disorder and other stress reactions |                                                                                                             |                               |                                                       |                                    |                      |
|---------------------------------------------------------------------------------------------------------|-------------------------------------------------------------------------------------------------------------|-------------------------------|-------------------------------------------------------|------------------------------------|------------------------------------------------|-------------------------------------------------------------------------------------------------------------|-------------------------------|-------------------------------------------------------|------------------------------------|----------------------|
|                                                                                                         | No. of autoimmune disease cases/ No. of accumulated person-years×1 000 (incidence rate/ 1 000 person-years) |                               | Absolute rate difference/ 1 000 person-years (95% CI) | Hazard ratio (95% CI) <sup>a</sup> | P value <sup>b</sup>                           | No. of autoimmune disease cases/ No. of accumulated person-years×1 000 (incidence rate/ 1 000 person-years) |                               | Absolute rate difference/ 1 000 person-years (95% CI) | Hazard ratio (95% CI) <sup>a</sup> | P value <sup>b</sup> |
|                                                                                                         | Exposed patients                                                                                            | Matched unexposed Individuals |                                                       |                                    |                                                | Exposed patients                                                                                            | Matched unexposed Individuals |                                                       |                                    |                      |
| <b>Psychiatric comorbidity<sup>c</sup></b>                                                              |                                                                                                             |                               |                                                       |                                    |                                                |                                                                                                             |                               |                                                       |                                    |                      |
| Yes                                                                                                     | 691/74.1(9.3)                                                                                               | 4712/795.6(5.9)               | 3.40 (2.68-4.11)                                      | 1.56 (1.44-1.70)                   | <.001                                          | 1292/177.3(7.3)                                                                                             | 9834/1886.0(5.2)              | 2.07 (1.66-2.48)                                      | 1.39 (1.31-1.47)                   | .61                  |
| No                                                                                                      | 2758/302.5(9.1)                                                                                             | 19391/3194.4(6.1)             | 3.05 (2.70-3.40)                                      | 1.30 (1.25-1.36)                   | 1                                              | 3011/307.5(9.8)                                                                                             | 20362/3266.6(6.2)             | 3.56 (3.20-3.92)                                      | 1.36 (1.30-1.42)                   |                      |
| <b>Type of psychiatric care<sup>d</sup> (for patients diagnosed after 2000)</b>                         |                                                                                                             |                               |                                                       |                                    |                                                |                                                                                                             |                               |                                                       |                                    |                      |
| Both inpatient and outpatient                                                                           | 125/10.7(11.7)                                                                                              | 766/112.6(6.8)                | 4.92 (2.81-7.03)                                      | 1.39 (1.13-1.71)                   | .11                                            | 65/5.9(11.0)                                                                                                | 410/61.4(6.7)                 | 4.36 (1.60-7.12)                                      | 1.49 (1.11-2.00)                   | .77                  |
| Inpatient only                                                                                          | 436/39.5(11.0)                                                                                              | 2770/418.7(6.6)               | 4.42 (3.36-5.49)                                      | 1.47 (1.32-1.65)                   |                                                | 318/28.4(11.2)                                                                                              | 2196/301.4(7.3)               | 3.93 (2.66-5.20)                                      | 1.33 (1.17-1.51)                   |                      |
| Outpatient only                                                                                         | 1010/102.5(9.9)                                                                                             | 7144/1051.2(6.8)              | 3.06 (2.43-3.69)                                      | 1.30 (1.21-1.39)                   |                                                | 1553/146.4(10.6)                                                                                            | 10235/1490.7(6.9)             | 3.74 (3.20-4.28)                                      | 1.41 (1.33-1.49)                   |                      |
| <b>Total days of inpatient stay<sup>d</sup> (for patients received any inpatient care, by tertiles)</b> |                                                                                                             |                               |                                                       |                                    |                                                |                                                                                                             |                               |                                                       |                                    |                      |
| 1-4 days                                                                                                | 1321/151.5(8.7)                                                                                             | 9236/1605.1(5.8)              | 2.97 (2.48-3.45)                                      | 1.36 (1.27-1.44)                   | .95                                            | 1233/154.4(8.0)                                                                                             | 9115/1663.8(5.5)              | 2.51 (2.05-2.97)                                      | 1.30 (1.22-1.39)                   | .39                  |
| 5-12 days                                                                                               | 594/67.3(8.8)                                                                                               | 4099/722.9(5.7)               | 3.16 (2.43-3.89)                                      | 1.40 (1.28-1.54)                   |                                                | 697/83.9(8.3)                                                                                               | 5010/907.0(5.5)               | 2.78 (2.15-3.42)                                      | 1.36 (1.25-1.49)                   |                      |
| >12 days                                                                                                | 523/55.3(9.5)                                                                                               | 3616/609.5(5.9)               | 3.53 (2.70-4.37)                                      | 1.37 (1.24-1.52)                   |                                                | 819/100.0(8.2)                                                                                              | 5833/1090.7(5.4)              | 2.84 (2.26-3.42)                                      | 1.38 (1.27-1.50)                   |                      |
| <b>Frequency of outpatient visits<sup>d</sup> (for patients received outpatient care alone)</b>         |                                                                                                             |                               |                                                       |                                    |                                                |                                                                                                             |                               |                                                       |                                    |                      |
| <3 times                                                                                                | 901/91.0(9.9)                                                                                               | 6385/935.4(6.8)               | 3.07 (2.40-3.74)                                      | 1.31 (1.21-1.41)                   | .56                                            | 1258/119.5(10.5)                                                                                            | 8424/1217.8(6.9)              | 3.61 (3.01-4.21)                                      | 1.39 (1.31-1.48)                   | .27                  |
| ≥3 times                                                                                                | 110/11.6(9.5)                                                                                               | 767/117.1(6.6)                | 2.97 (1.13-4.81)                                      | 1.26 (1.02-1.55)                   |                                                | 296/26.9(11.0)                                                                                              | 1814/273.3(6.6)               | 4.36 (3.07-5.65)                                      | 1.50 (1.31-1.70)                   |                      |
| <b>Use of selective serotonin reuptake inhibitors within the first year after diagnosis<sup>e</sup></b> |                                                                                                             |                               |                                                       |                                    |                                                |                                                                                                             |                               |                                                       |                                    |                      |
| <u>Dose level</u> <u>Duration, days (by tertiles)</u>                                                   |                                                                                                             |                               |                                                       |                                    |                                                |                                                                                                             |                               |                                                       |                                    |                      |
| No medication                                                                                           | 457/50.1(9.1)                                                                                               | 3522/517.2(6.8)               | 2.32 (1.45-3.18)                                      | 1.18 (1.07-1.31)                   | .64 <sup>f</sup>                               | 645/59.1(10.9)                                                                                              | 4241/603.2(7.0)               | 3.88 (3.01-4.75)                                      | 1.42 (1.30-1.55)                   | .41 <sup>f</sup>     |
| Low dose ≤179                                                                                           | 6/1.3(4.7)                                                                                                  | 97/13.0(7.5)                  | -2.8 (-6.9-1.20)                                      | 0.58 (0.25-1.34)                   |                                                | 13/1.6(8.1)                                                                                                 | 116/16.0(7.2)                 | 0.88 (-3.7-5.49)                                      | 1.12 (0.62-1.99)                   |                      |
| (≤1.0 DDD/day) 180-319                                                                                  | 38/3.0(12.8)                                                                                                | 213/30.5(7.0)                 | 5.76 (1.60-9.92)                                      | 1.59 (1.10-2.30)                   |                                                | 54/3.9(13.8)                                                                                                | 268/40.1(6.7)                 | 7.11 (3.34-10.9)                                      | 2.12 (1.51-2.97)                   |                      |
| ≥320                                                                                                    | 44/2.9(15.0)                                                                                                | 204/30.0(6.8)                 | 8.19 (3.66-12.7)                                      | 2.07 (1.45-2.94)                   |                                                | 59/4.2(13.9)                                                                                                | 334/43.7(7.6)                 | 6.30 (2.65-9.94)                                      | 1.70 (1.25-2.30)                   |                      |

**eTable 5. Risk of Autoimmune Disease Among Patients With Acute Stress Reaction or Adjustment Disorder and Other Stress Reactions by Psychiatric Care Indicators, Compared to Matched Unexposed Individuals (Continued)**

| Indicators of psychiatric care | Acute stress reaction                                                                                       |                               |                                                       |                                    |                      | Adjustment disorder and other stress reactions                                                              |                               |                                                       |                                    |                      |
|--------------------------------|-------------------------------------------------------------------------------------------------------------|-------------------------------|-------------------------------------------------------|------------------------------------|----------------------|-------------------------------------------------------------------------------------------------------------|-------------------------------|-------------------------------------------------------|------------------------------------|----------------------|
|                                | No. of autoimmune disease cases/ No. of accumulated person-years×1 000 (incidence rate/ 1 000 person-years) |                               | Absolute rate difference/ 1 000 person-years (95% CI) | Hazard ratio (95% CI) <sup>a</sup> | P value <sup>b</sup> | No. of autoimmune disease cases/ No. of accumulated person-years×1 000 (incidence rate/ 1 000 person-years) |                               | Absolute rate difference/ 1 000 person-years (95% CI) | Hazard ratio (95% CI) <sup>a</sup> | P value <sup>b</sup> |
|                                | Exposed patients                                                                                            | Matched unexposed Individuals |                                                       |                                    |                      | Exposed patients                                                                                            | Matched unexposed Individuals |                                                       |                                    |                      |
| High dose (≤179 DDD/day)       | 41/2.7(15.2)                                                                                                | 198/28.3(7.0)                 | 8.23 (3.47-13.0)                                      | 1.85 (1.26-2.72)                   |                      | 41/3.2(12.9)                                                                                                | 238/33.2(7.2)                 | 5.72 (1.67-9.77)                                      | 1.42 (0.98-2.06)                   |                      |
| (>1.0 DDD/day)                 | 56/4.8(11.7)                                                                                                | 336/49.3(6.8)                 | 4.89 (1.74-8.04)                                      | 1.44 (1.06-1.97)                   |                      | 94/7.5(12.6)                                                                                                | 544/75.6(7.2)                 | 5.39 (2.77-8.00)                                      | 1.42 (1.11-1.82)                   |                      |
|                                | 56/4.6(12.1)                                                                                                | 324/47.7(6.8)                 | 5.27 (2.02-8.51)                                      | 1.66 (1.25-2.22)                   |                      | 83/6.4(12.9)                                                                                                | 476/65.2(7.3)                 | 5.64 (2.78-8.50)                                      | 1.73 (1.36-2.19)                   |                      |

DDD, Defined Daily Dose: defined by the World Health Organization as ‘the assumed average maintenance dose per day for a drug used for its main indication in adults’. DDD for selective serotonin reuptake inhibitors can be found at [https://www.whocc.no/atc\\_ddd\\_index/?showdescription=yes&code=N06AB](https://www.whocc.no/atc_ddd_index/?showdescription=yes&code=N06AB).

<sup>a</sup> Cox regression models were stratified by matching identifiers (birth year and sex), and adjusted for education level, family income, marital status, Charlson comorbidity index score, family history of autoimmune disease, and history of other psychiatric disorders. The first year of follow-up was excluded for all analyses.

<sup>b</sup> For nominal variables (i.e., psychiatric comorbidity, type of psychiatric care), P value for subgroup difference was derived from the Wald test. For ordinal variables (i.e., total days of inpatient stay, frequency of outpatient visits, and duration of the selective serotonin reuptake inhibitors use), P value for trend was derived from Wald test to test the potential dose-response relationship.

<sup>c</sup> Psychiatric disorders (other than stress-related disorders) diagnosed *from* 3 months before *to* 1 year after the diagnosis of stress-related disorders.

<sup>d</sup> Psychiatric care (i.e., inpatient or outpatient visit with any stress-related disorder as main diagnosis) received within 1 year after the stress-related disorder diagnosis, according to information from the National Patient Register.

<sup>e</sup> Only for patients diagnosed after July 1 2005. Dose and duration was calculated according to the records from the Drug Prescription Register.

<sup>f</sup> P value was calculated for different duration groups (≤179, 180-319, and ≥320 days) among drug users, irrespective of dosage level.

**eTable 6. Association of Stress-Related Disorders With Subsequent Autoimmune Disease, Additionally Adjusted for the Number of Health Care Visits During the First Year After Study Entry, Analysis of the Population-Matched Cohort**

|                                                 | No. of autoimmune disease cases/ No. of accumulated person-years×1 000 (incidence rate/ 1 000 person-years) |                             | Absolute rate difference/ 1 000 person-years (95% CI) | Hazard ratio (95% CI) <sup>b</sup> |
|-------------------------------------------------|-------------------------------------------------------------------------------------------------------------|-----------------------------|-------------------------------------------------------|------------------------------------|
|                                                 | Exposed patients                                                                                            | Matched exposed individuals |                                                       |                                    |
| All stress-related disorders                    | 8284/911.7(9.1)                                                                                             | 57711/9675.7(6.0)           | 3.12 (2.92-3.32)                                      | 1.28 (1.25-1.31)                   |
| Posttraumatic stress disorder                   | 532/50.3(10.6)                                                                                              | 3412/533.1(6.4)             | 4.18 (3.25-5.10)                                      | 1.31 (1.18-1.46)                   |
| Acute stress reaction                           | 3449/376.6(9.2)                                                                                             | 24103/3990.0(6.0)           | 3.12 (2.80-3.43)                                      | 1.27 (1.22-1.32)                   |
| Adjustment disorders and other stress reactions | 4303/484.8(8.9)                                                                                             | 30196/5152.6(5.9)           | 3.02 (2.74-3.29)                                      | 1.29 (1.24-1.33)                   |

<sup>a</sup> Both inpatient stay and outpatient visit were included. The first month after study entry was removed from this calculation.

<sup>b</sup> Cox models were stratified by matching identifiers (birth year and sex), and adjusted for education level, family income, marital status, Charlson comorbidity index score, family history of autoimmune disease, history of other psychiatric disorders, and the frequency of health care visits during first year after study entry (as continuous variable). The first year of follow-up was excluded for all analyses.

**eTable 7. Association of Stress-Related Disorders With Subsequent Autoimmune Disease, Using Altered Definition for History of Other Psychiatric Disorders (One of Covariates) and Autoimmune Disease (Outcome), Analysis of the Population-Matched Cohort**

| Definitions                                             |                                                    | No. of autoimmune disease cases/<br>No. of accumulated person-<br>years×1 000 (incidence rate/ 1 000<br>person-years) |                                   | Absolute rate<br>difference/ 1<br>000 person-<br>years (95% CI) | Hazard ratio<br>(95% CI) <sup>a</sup> |
|---------------------------------------------------------|----------------------------------------------------|-----------------------------------------------------------------------------------------------------------------------|-----------------------------------|-----------------------------------------------------------------|---------------------------------------|
|                                                         |                                                    | Exposed<br>patients                                                                                                   | Matched<br>exposed<br>individuals |                                                                 |                                       |
| <b><i>For history of other psychiatric disorder</i></b> |                                                    |                                                                                                                       |                                   |                                                                 |                                       |
| Prior to<br>180 days<br>before<br>study entry           | All stress-related disorders                       | 8284/911.7(9.1)                                                                                                       | 57711/9675.7(6.0)                 | 3.12 (2.99-<br>3.25)                                            | 1.37 (1.34-<br>1.41)                  |
|                                                         | Posttraumatic stress<br>disorder                   | 532/50.3(10.6)                                                                                                        | 3412/533.1(6.4)                   | 4.18 (4.14-<br>4.21)                                            | 1.46 (1.32-<br>1.62)                  |
|                                                         | Acute stress reaction                              | 3449/376.6(9.2)                                                                                                       | 24103/3990.0(6.0)                 | 3.12 (2.80-<br>3.43)                                            | 1.36 (1.31-<br>1.41)                  |
|                                                         | Adjustment disorders and<br>other stress reactions | 4303/484.8(8.9)                                                                                                       | 30196/5152.6(5.9)                 | 3.02 (2.74-<br>3.29)                                            | 1.38 (1.33-<br>1.43)                  |
| <b><i>For autoimmune diseases</i></b>                   |                                                    |                                                                                                                       |                                   |                                                                 |                                       |
| At least<br>two times<br>of identical<br>diagnosis      | All stress-related disorders                       | 4844/930.3(5.2)                                                                                                       | 35608/9791.1(3.6)                 | 1.57 (1.42-<br>1.72)                                            | 1.30 (1.25-<br>1.34)                  |
|                                                         | Posttraumatic stress<br>disorder                   | 303/51.4(5.9)                                                                                                         | 2071/539.8(3.8)                   | 2.06 (1.38-<br>2.75)                                            | 1.45 (1.27-<br>1.66)                  |
|                                                         | Acute stress reaction                              | 2019/384.1(5.3)                                                                                                       | 14916/4036.2(3.7)                 | 1.56 (1.32-<br>1.80)                                            | 1.27 (1.21-<br>1.34)                  |
|                                                         | Adjustment disorders and<br>other stress reactions | 2522/494.8(5.1)                                                                                                       | 18621/5215.1(3.6)                 | 1.53 (1.32-<br>1.73)                                            | 1.30 (1.24-<br>1.36)                  |
| Only main<br>diagnosis<br>of inpatient<br>stay          | All stress-related disorders                       | 1477/951.3(1.6)                                                                                                       | 9396/9958.5(0.9)                  | 0.61 (0.53-<br>0.69)                                            | 1.41 (1.33-<br>1.49)                  |
|                                                         | Posttraumatic stress<br>disorder                   | 105/52.7(2.0)                                                                                                         | 541/549.0(1.0)                    | 1.01 (0.62-<br>1.40)                                            | 1.89 (1.50-<br>2.39)                  |
|                                                         | Acute stress reaction                              | 603/393.4(1.5)                                                                                                        | 3671/4109.1(0.9)                  | 0.64 (0.51-<br>0.77)                                            | 1.44 (1.31-<br>1.58)                  |
|                                                         | Adjustment disorders and<br>other stress reactions | 769/505.2(1.5)                                                                                                        | 5184/5300.3(1.0)                  | 0.54 (0.43-<br>0.65)                                            | 1.34 (1.23-<br>1.45)                  |

<sup>a</sup> Cox models were stratified by matching identifier (birth year and sex), and adjusted for education level, family income, marital status, Charlson comorbidity index score, family history of autoimmune disease, and history of other psychiatric disorders (defined as stated above, or otherwise as psychiatric disorders, other than stress-related disorders, diagnosed at least 90 days before study entry). The first year of follow-up was excluded.

**eTable 8. Association of Stress-Related Disorders With Subsequent Autoimmune Disease, Using Different Lag-Time, Analysis of the Population-Matched Cohort**

| Lag time                                        |                                                    | No. of autoimmune disease cases/<br>No. of accumulated person-<br>years×1 000 (incidence rate/ 1 000<br>person-years) |                                   | Absolute rate<br>difference/<br>1,000 person-<br>years (95% CI) | Hazard ratio<br>(95% CI) <sup>a</sup> |
|-------------------------------------------------|----------------------------------------------------|-----------------------------------------------------------------------------------------------------------------------|-----------------------------------|-----------------------------------------------------------------|---------------------------------------|
|                                                 |                                                    | Exposed<br>patients                                                                                                   | Matched<br>exposed<br>individuals |                                                                 |                                       |
| 2-years<br>after study<br>entry was<br>excluded | All stress-related disorders                       | 7455/817.5(9.1)                                                                                                       | 52727/8717.3(6.1)                 | 3.07 (2.86-<br>3.28)                                            | 1.35 (1.32-<br>1.39)                  |
|                                                 | Posttraumatic stress<br>disorder                   | 467/44.5(10.5)                                                                                                        | 3117/474.2(6.6)                   | 3.92 (2.94-<br>4.90)                                            | 1.44 (1.30-<br>1.61)                  |
|                                                 | Acute stress reaction                              | 3123/335.6(9.3)                                                                                                       | 21925/3572.3(6.1)                 | 3.17 (2.83-<br>3.50)                                            | 1.35 (1.30-<br>1.41)                  |
|                                                 | Adjustment disorders and<br>other stress reactions | 3865/437.4(8.8)                                                                                                       | 27685/4670.9(5.9)                 | 2.91 (2.62-<br>3.20)                                            | 1.35 (1.30-<br>1.40)                  |
| 5-years<br>after study<br>entry was<br>excluded | All stress-related disorders                       | 5462/575.8(9.5)                                                                                                       | 39781/6231.7(6.4)                 | 3.10 (2.84-<br>3.36)                                            | 1.34 (1.30-<br>1.39)                  |
|                                                 | Posttraumatic stress<br>disorder                   | 328/30.2(10.9)                                                                                                        | 2317/327.5(7.1)                   | 3.77 (2.57-<br>4.98)                                            | 1.42 (1.25-<br>1.60)                  |
|                                                 | Acute stress reaction                              | 2284/231.6(9.9)                                                                                                       | 16342/2499.8(6.5)                 | 3.32 (2.91-<br>3.74)                                            | 1.36 (1.30-<br>1.43)                  |
|                                                 | Adjustment disorders and<br>other stress reactions | 2850/313.9(9.1)                                                                                                       | 21122/3404.4(6.2)                 | 2.87 (2.53-<br>3.22)                                            | 1.32 (1.27-<br>1.38)                  |

<sup>a</sup> Cox models were stratified by matching identifiers (birth year and sex), and adjusted for education level, family income, marital status, Charlson comorbidity index score, family history of autoimmune disease, and history of other psychiatric disorders. The first year after study entry was excluded.

**eFigure 1. Hazard Ratios of Autoimmune Disease Within the First Year of Study Entry, Analysis of the Population-Matched Cohort**

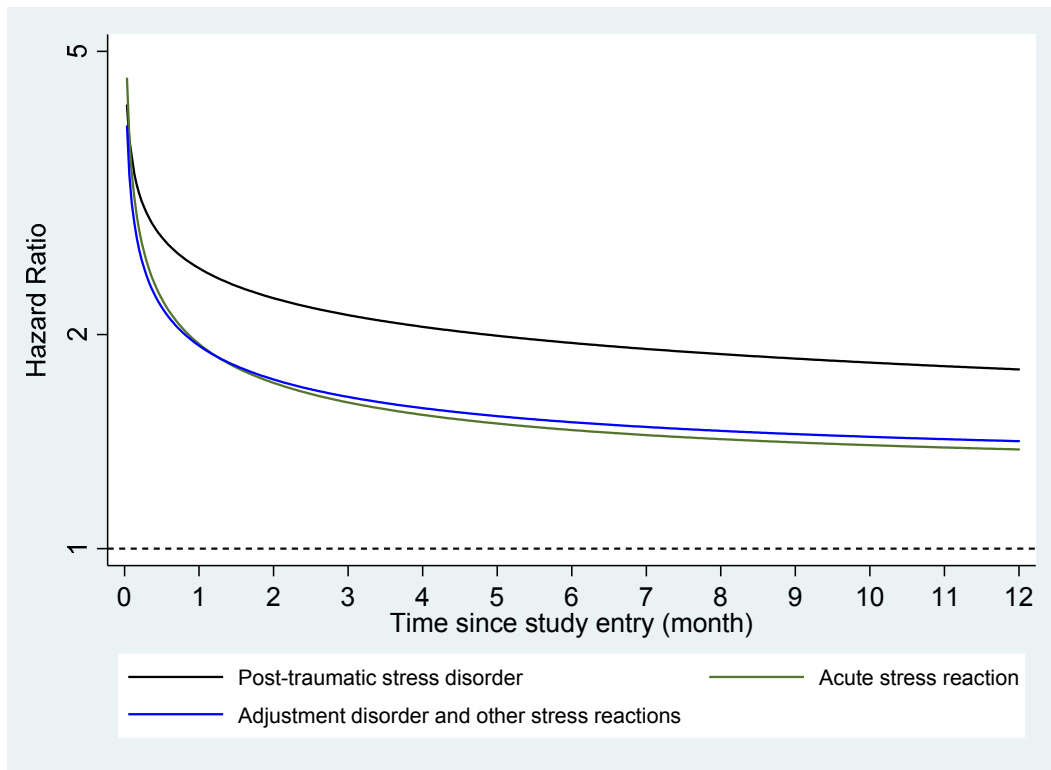

<sup>a</sup> Hazard ratios were estimated from flexible parametric survival models, allowing the effect of stress-related disorder diagnosis to vary over time. A spline with 5 df (4 intermediate knots and 2 knots at each boundary, placed at quintiles of distribution of events) was used for the baseline rate, while 3 df was used for the time-varying effect. All models were stratified by matching identifiers (birth year and sex), and adjusted for education level, family income, marital status, Charlson comorbidity index score, family history of autoimmune disease, and history of other psychiatric disorder.

The analyses were based on 6 607 exposed patients and 66 070 matched unexposed individuals for posttraumatic stress disorder, 46 693 exposed patients and 466 930 matched unexposed individuals for acute stress reaction, 53 164 exposed patients and 531 640 matched unexposed individuals for adjustment disorder and other stress reactions.

**eFigure 2. Associations Between Stress-Related Disorders and Multiple Autoimmune Syndrome (MAS), Analysis of the Population-Matched Cohort**

|                                                | No. of events/ No. of accumulated person-years×1 000 (incidence rate/ 1 000 person-years) |                             | Hazard ratio (95% CI) <sup>a</sup> |
|------------------------------------------------|-------------------------------------------------------------------------------------------|-----------------------------|------------------------------------|
|                                                | Exposed patients                                                                          | Match unexposed individuals |                                    |
| All stress-related disorders                   | 8284/911.7(9.1)                                                                           | 57711/9675.7(6.0)           | 1.36 (1.33-1.40)                   |
|                                                | 940/911.7(1.0)                                                                            | 6517/9675.7(0.7)            | 1.36 (1.26-1.47)                   |
|                                                | 198/911.7(0.2)                                                                            | 1274/9675.7(0.1)            | 1.46 (1.24-1.72)                   |
| Posttraumatic stress disorder                  | 532/50.3(10.6)                                                                            | 3412/533.1(6.4)             | 1.46 (1.32-1.61)                   |
|                                                | 71/50.3(1.4)                                                                              | 335/533.1(0.6)              | 2.29 (1.72-3.04)                   |
|                                                | 18/50.3(0.4)                                                                              | 63/533.1(0.1)               | 2.78 (1.52-5.09)                   |
| Acute stress reaction                          | 3449/376.6(9.2)                                                                           | 24103/3990.0(6.0)           | 1.35 (1.30-1.40)                   |
|                                                | 385/376.6(1.0)                                                                            | 2630/3990.0(0.7)            | 1.35 (1.20-1.51)                   |
|                                                | 80/376.6(0.2)                                                                             | 465/3990.0(0.1)             | 1.66 (1.28-2.15)                   |
| Adjustment disorder and other stress reactions | 4303/484.8(8.9)                                                                           | 30196/5152.6(5.9)           | 1.37 (1.32-1.41)                   |
|                                                | 484/484.8(1.0)                                                                            | 3552/5152.6(0.7)            | 1.29 (1.17-1.43)                   |
|                                                | 100/484.8(0.2)                                                                            | 746/5152.6(0.1)             | 1.23 (0.98-1.55)                   |
|                                                |                                                                                           |                             |                                    |

\* Any autoimmune disease  
 ● MAS-more than 3 types of autoimmune diseases  
 ▲ MAS-more than 5 types of autoimmune diseases

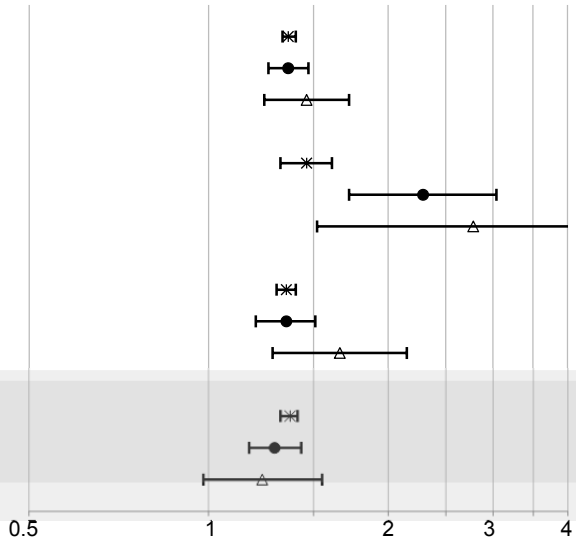

<sup>a</sup> Cox models were stratified by matching identifiers (birth year and gender), and adjusted for education level, family income, marital status, Charlson comorbidity index score, family history of autoimmune disease, and history of other psychiatric disorder. The first year of follow-up was excluded from analyses.

**eFigure 3. Cumulative Incidence Rates of Autoimmune Disease Among Patients With Stress-Related Disorder (Exposed Group) and Their Matched Unexposed Individuals (Unexposed Group)<sup>a</sup>**

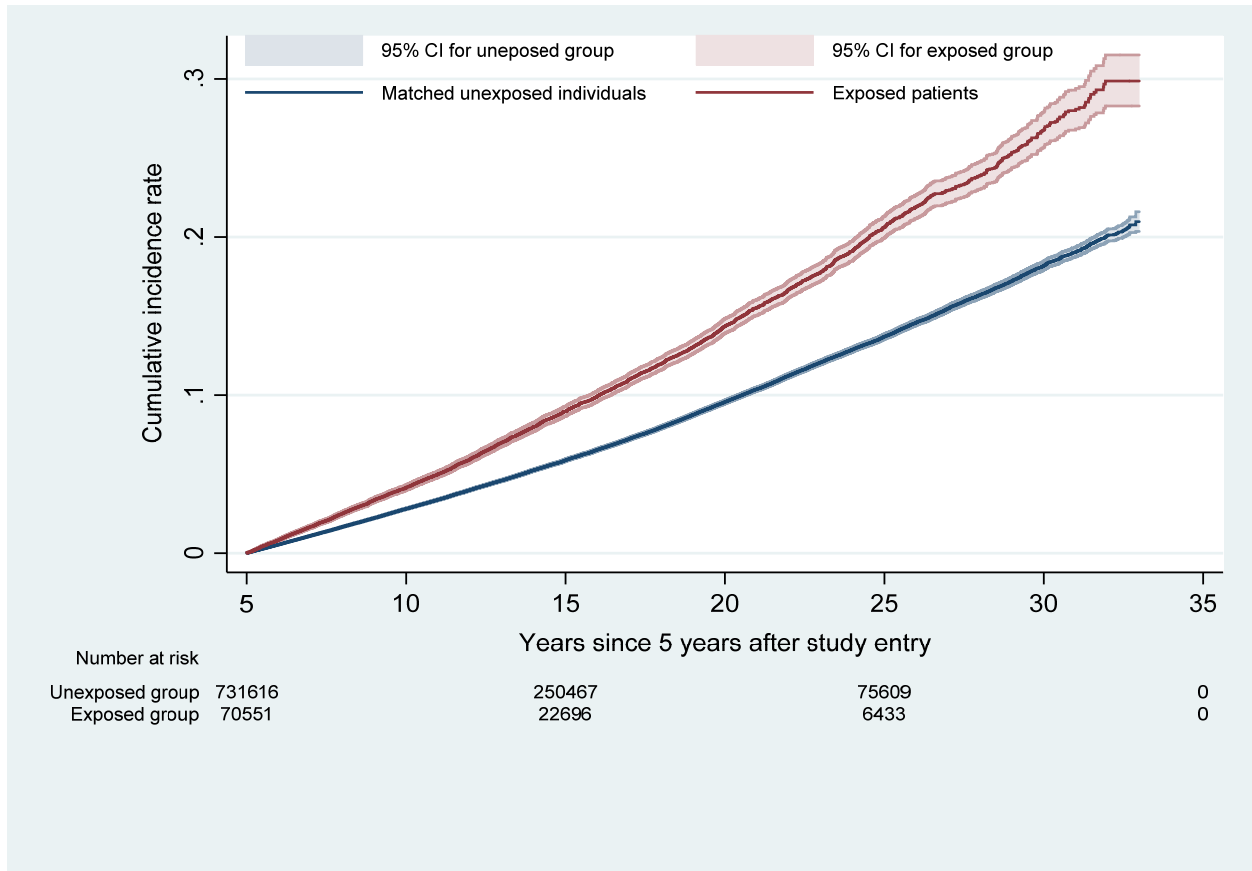

<sup>a</sup> Only participants with more than 5 years follow-up were included.
